# Supplementary material for: GABAergic Signaling Is Linked to a Hypermigratory Phenotype in Dendritic Cells Infected by Toxoplasma gondii
Source: PLoS Pathog. 2012 Dec 6;8(12):e1003051. doi: 10.1371/journal.ppat.1003051 (PMC3516538; doi:10.1371/journal.ppat.1003051)
Supplement: Table S1 — Primer pair sequences used to screen DC and astrocyte cDNA for 19 GABAAR subunit transcripts and primer sequences for GAD 65, GAD 67, GAT4 and GAPDH cDNA. Primers were designed as indicated under Materials and Methods . (DOCX) [file ppat.1003051.s009.docx]

**Supplementary Table SI.** Primers used to amplify GABAAR channel sub-units, GAD 65, GAD 67 and GAPDH cDNA.

| **GABAAR Subunit** | **Primer sequencea** | **Amplicon size (bp)** | **Amplicon position** |
| --- | --- | --- | --- |
| α1 | F:5’-AGTGGTTGTAGCAGAAGATG-3’  R: 5’-AGGAGACTTGGGAGAGAATA-3’ | 200 | 1392-1591 |
| α2 | F: 5’-CCAAGTGTCATTCTGGCTGA-3’  R: 5’-CGCATAGGCGTTGTTCTGTA-3’ | 301 | 1095-1395 |
| α3 | F: 5’-TCCTGCTGAGACCAAGACCT-3’  R: 5’-GGCTCAATCCAAGCAATGTT-3’ | 361 | 1601-1961 |
| α3 RT | F: 5’-TGTCCCTGCCCGCACAGTCT-3’  R: 5’-GGCCGTCGCGTATGCCACTT-3’ | 103 | 1184-1286 |
| α4 | F: 5’-TCCCCTGAGTTACAGGTTGG-3’  R: 5’-CAGAAACCATCTTCGCAACA-3’ | 372 | 138-509 |
| α5 | F: 5’-GGACTCTTGGATGGCTATGA-3’  R: 5’-ATTGTCAGACGCATGGTGTA-3’ | 344 | 507-850 |
| α6 | F: 5’-AACTTTCAGTGGCATTGGAC-3’  R: 5’-GAACCTCCTGGTGTTAGCAA-3’ | 225 | 2133-2357 |
| β1 | F: 5’-AAGGTGGAGTTCACAACAGG-3’  R: 5’-TTTGACGTAAGGGATCTTCG-3’ | 249 | 664-912 |
| β2 | F: 5’-CACAATGCTTGCCTATGATG-3’  R: 5’-CTTCTCACGGAAGGCTGTAG-3’ | 274 | 1600-1873 |
| β3 | F: 5’-CAGTCACCATGGACTGACAC-3’  R: 5’-TGTCTCCTCCCACTGTTACC-3’ | 292 | 3209-3500 |
| γ1 | F: 5’-TGTTCAATCTGGTTTACTGG-3’  R: 5’-AGCTAATGAGCAATCTAGGC-3’ | 457 | 1756-2212 |
| γ2 | F: 5’-TCTCTGCCCAAGGTCTCCTA-3’  R: 5’-AAGGTGTGTGGCATTGTTCA-3’ | 219 | 959-1177 |
| γ3 | F: 5’-CAGGACCTGACAGACAAGCA-3’  R: 5’-TATTGGCAAATGCCTGAACA-3’ | 356 | 1135-1520 |
| δ | F: 5’-GAATCCGTTCCAGACTCAAA-3’  R: 5’-GCACTAGGCTCAACTTCAGG-3’ | 349 | 1339-1687 |
| θ | F: 5’-GCTGGAGGTGGAGAGCTATG-3’  R: 5’-GGAGAGAATGGTGGTGAGGA-3’ | 253 | 614-866 |
| ε | F: 5’-TCAATGCGAAGAACACTTGG-3’  R: 5’-AGAAGTCCAAAGCCGTGAGA-3’ | 327 | 1954-2280 |
| π | F: 5’-CGTCCATGAAGACTTGCTGA-3’  R: 5’-TCAGGCAGGGTAATCCACTC-3’ | 324 | 2294-2617 |
| ρ1 | F: 5’-CTGGAAATCGAAAGCTACGC-3’  R: 5’-AGATGTGACGACGCAGAGTG-3’ | 205 | 741-945 |
| ρ1 RT | F: 5’-GCTGCTGAGAGCACAGCGCA-3’  R: 5’-TGGGCTGCCTTGCTTGTGGG-3’ | 120 | 159-278 |
| ρ2 | F: 5’-CCAAGCCAAGCCATTTGTAT-3’  R: 5’-GTCCCTCCAGTAATGCCTCA-3’ | 227 | 246-472 |
| ρ3 | F: 5’-TACTGGAAACACGGCAACAA-3’  R: 5’-ACCGCCTTGACATAGGACAC-3’ | 347 | 634-980 |
| GAD65 | F: 5’-GCTGGAACCACCGTGTATGG-3’  R: 5’-TCCACGTGCATCCAGATCTTAT-3’ | 86 | 1342-1427 |
| GAD67 | F: 5’-TCCACCATCAACGGCATTAT-3’  R: 5’-AGCGGCAGGTGTTGGATAAC-3’ | 88 | 4651-4738 |
| GAPDH | F:5’-CCCATCACCATCTTCCAGCA-3’  R:5’-CGACATACTCAGCACCGGC-3’ | 70 | 277-328 |

a Primers were designed as indicated under Materials and Methods.
